# Supplementary material
Source: Springer Nature journal article supplement (https://mijn.bsl.nl/resource/supplementary/13047_2010_198_MOESM3_ESM.pdf/7110714)

**Difference Rater 1 vs Rater 2 Rearfoot to forefoot**

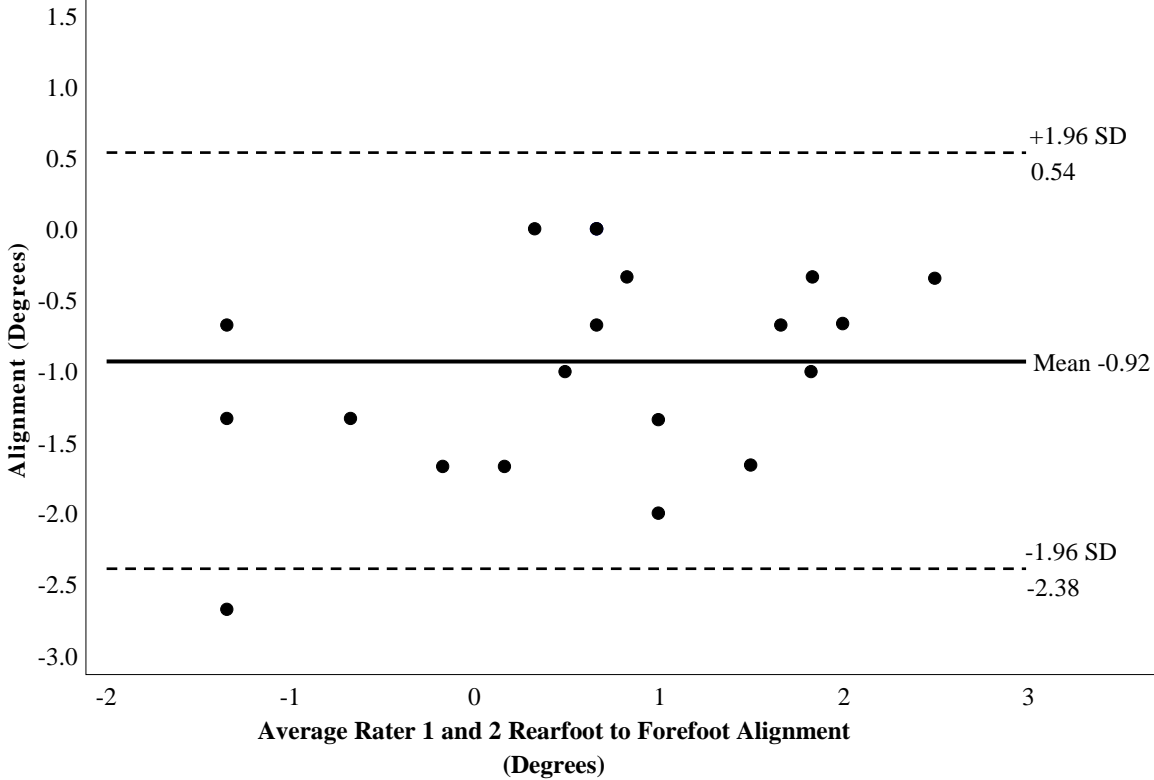

Supplement: MOESM3 [file 7110714]
